# Supplementary material
Source: Springer Nature journal article supplement (https://www.springermedizin.de/resource/supplementary/12885_2013_4195_MOESM3_ESM.pdf/9465738)

### K7

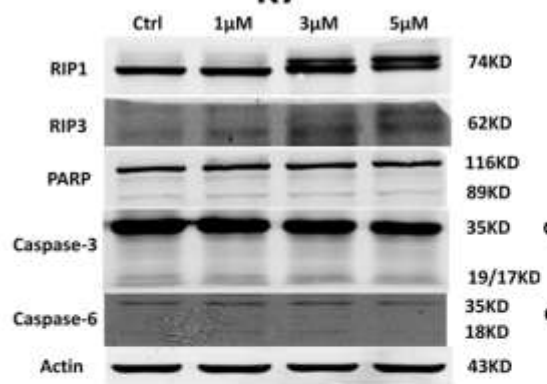

### U2OS

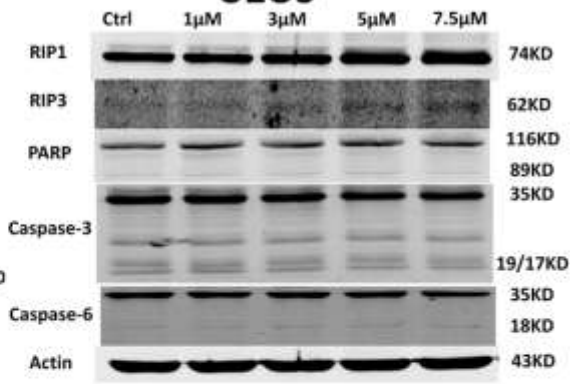

### 143B

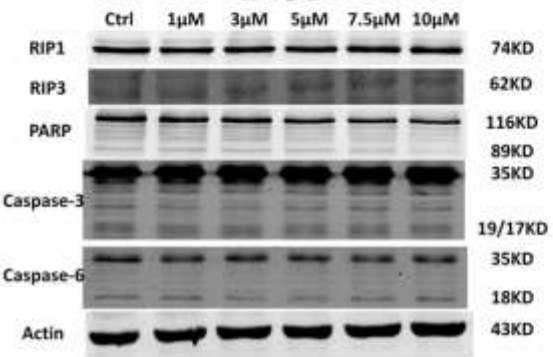

Supplement: MOESM3 [file 9465738]
